# 1 Purge Haplotigs: Synteny Reduction for Third-gen Diploid Genome 2 Assemblies

3 Michael J Roach<sup>1\*</sup>, Simon Schmidt<sup>1</sup> and Anthony R Borneman<sup>1</sup>

4 <sup>1</sup>*The Australian Wine Research Institute, PO Box 197, Glen Osmond, SA 5064.*

5 *\*Corresponding author: Michael Roach*

6 *p: +61 8313 6600*

7 *e: [michael.roach@awri.com.au](mailto:michael.roach@awri.com.au)*

## 8 **Abstract**

9 Recent developments in third-gen long read sequencing and diploid-aware assemblers have resulted  
10 in the rapid release of numerous reference-quality assemblies for diploid genomes. However,  
11 assembling highly heterozygous genomes is still facing a major problem where the two haplotypes for  
12 a region are highly polymorphic and the synteny is not recognised during assembly. This causes  
13 issues with downstream analysis, for example variant discovery using the haploid assembly, or  
14 haplotype reconstruction using the diploid assembly. A new pipeline—Purge Haplotigs—was  
15 developed specifically for third-gen assemblies to identify and reassign the duplicate contigs. The  
16 pipeline takes a draft haplotype-fused assembly or a diploid assembly, and read alignments to  
17 produce an improved assembly. The pipeline was tested on a simulated dataset and on four recent  
18 diploid (phased) *de novo* assemblies from third-generation long-read sequencing. All assemblies after  
19 processing with Purge Haplotigs were less duplicated with minimal impact on genome completeness.  
20 The software is available at [https://bitbucket.org/mroachawri/purge\\_haplotigs](https://bitbucket.org/mroachawri/purge_haplotigs) under a permissive MIT  
21 licence.

## 22 **Background**

23 Recent advances in third-generation single-molecule sequencing have enabled *de novo* genome  
24 assemblies that have extremely high levels of contiguity and completeness (Badouin et al., 2017,  
25 Jarvis et al., 2017, Loman et al., 2015). Furthermore, recent advances in 'diploid aware' genome  
26 assemblers have considerably improved the quality of highly heterozygous diploid genome  
27 assemblies (Chin et al., 2016, Korf et al., 2017). Diploid-aware assemblers such as FALCON and  
28 Canu are available that will produce a haplotype-fused representation of a diploid genome (Chin et  
29 al., 2016, Koren et al., 2017), and some assemblers such as FALCON Unzip and Supernova will go  
30 further to produce large phase blocks where both parent alleles are represented separately (Chin et  
31 al., 2016, Weisenfeld et al., 2017). For FALCON Unzip assemblies, which are the focus of this study,  
32 phasing occurs on the assembly graph to produce 'primary contigs' (the haploid assembly) and  
33 associated 'haplotigs', which together with the primary contigs form the diploid assembly.

34 Regions of very high heterozygosity still present a problem for *de novo* genome assembly (Kajitani et  
35 al., 2014, Safonova et al., 2015, Vinson et al., 2005). In this situation, once a pair of allelic sequences  
36 exceeds a certain threshold of nucleotide diversity, most algorithms will assemble these regions as  
37 separate contigs, rather than the expected single haplotype-fused contig (Pryszcz et al., 2014, Small  
38 et al., 2007). The presence of these syntenic contigs in a haploid assembly is problematic for  
39 downstream analysis (Olson et al., 2015). In the case of producing a diploid assembly, while both  
40 alleles may be present, steps are still required to identify the syntenic contig pairings.

41 Several tools have attempted to deal with this problem. The HaploMerger2 toolkit (Huang et al., 2017)  
42 and Redundans assembly pipeline (Pryszcz and Gabaldon, 2016) were designed to produce  
43 haplotype-fused assemblies from short-read sequences. However, both include steps that would not  
44 generally be employed for finishing an already highly contiguous long-read based assembly.  
45 Furthermore, resolving the haplotype sequences and producing a phased assembly has proven to be  
46 advantageous (Schwessinger et al., 2018, VanBuren et al., 2018). Scripts available for use with long-  
47 read assemblies include; `get_homologs.py`, which uses sequence alignments to identify homologues  
48 (Concepcion, 2016) and `HomolContigsByAnnotation`, which uses gene annotations to match syntenic  
49 regions (Kingan, 2016). Each has its unique strengths and drawbacks, but both suffer from requiring  
50 manual reassignment of contigs by the user.

51 The aim of this study was to develop a new pipeline that could quickly and automatically identify and  
52 reassign syntenic contigs specifically in assemblies produced with single-molecule long-read  
53 sequencing technology. Purge Haplotigs is designed to be easy to install and requires only three  
54 commands to complete. It will work on either the haploid assembly to produce a de-duplicated haploid  
55 assembly, or on the diploid assembly to produce a de-duplicated haploid assembly and an improved  
56 diploid assembly.

## 57 **Implementation**

58 The Purge Haplotigs pipeline is outlined in Figure 1. The pipeline requires two input files: a draft  
59 assembly in FASTA format, and an alignment file of reads mapped to the assembly in BAM format.  
60 The input draft assembly can be either the haploid or diploid assembly. For the aligned reads, the  
61 pipeline works best when the long-reads that were used for generating the assembly are mapped, but  
62 it will also work using short reads. A ‘random best’ alignment should be used for multi-mapping reads  
63 and the library should be one that produces an unbiased flat read-coverage.

## 64 **Read-depth analysis**

65 The first stage involves a read-depth analysis of the BAM file using BEDtools (Quinlan and Hall,  
66 2010). A read-depth histogram is initially produced for the assembly. For collapsed haplotype contigs  
67 the reads from both alleles will map, whereas if the alleles have assembled as separate contigs the  
68 reads will be split over the two contigs, resulting in half the read-depth. We exploit this to flag contigs  
69 that are likely to be haplotigs.

70 For a haploid assembly, a bimodal distribution should be observed if duplication has occurred  
71 (Figure 2). The left peak results from the duplicated regions and the right peak at twice the read-depth  
72 results from regions that are properly haplotype-fused. For a diploid assembly, as the entire assembly  
73 should be duplicated, the second peak should only be very small or not visible at all. The user  
74 chooses three cut-offs to capture the two peaks and the pipeline then calculates a breakdown of the  
75 read-depth proportions for each contig. Contigs with a high proportion of bases within the ‘duplicated’  
76 range for read-depth are flagged for further analysis. For a diploid assembly, as both haplotypes  
77 should be present, most of the contigs would be expected to be flagged for further analysis.

78 Contigs that have a majority of their bases displaying a read-depth outside of the defined bounds  
79 (abnormally low or high coverage) are further flagged for removal with the assumption that they are  
80 artefactual. It should be noted that contigs from organelle DNA sources may have a much higher  
81 read-depth than the rest of the genome, as such these may appear with the artefactual contigs after  
82 processing with Purge Haplotigs.

## 83 **Identification and assignment of homologous sequences**

84 Contigs that were flagged for further analysis according to read-depth are then subject to sequence  
85 alignment to attempt to identify synteny with its allelic companion contig. All flagged contigs therefore  
86 undergo a BLAST search (Camacho et al., 2009) against the entire assembly to identify discrete  
87 regions of nucleotide similarity. Chained alignments are then calculated using LASTZ (Harris, 2007)  
88 for each flagged contig against its BLAST best hit(s). Using these data Purge Haplotigs then  
89 calculates both the total portion of the flagged contig that aligns at least once (alignment score) and  
90 the sum of all alignments (max match score) between the flagged contig and its best hit contigs. The  
91 alignment score is used to determine if each flagged contig should be reassigned as a haplotig, while  
92 the max match score determines if it should instead be labelled as repetitive. The max match score is

93 intended to highlight problematic contigs such as collapsed repeats. It should be noted that highly  
94 repetitive genomic regions, such as centromeres and telomeres, may also be labelled as repetitive  
95 contigs. Conflicts may arise where haplotigs are nested, overlap, or are comprised of mostly repetitive  
96 sequence. This can cause individual contigs to be both flagged for reassignment and flagged as a  
97 reference for reassigning another contig. Where this occurs, the pipeline will only purge the contig that  
98 is most likely to be a nested haplotig or collapsed repeat. Because of this the LASTZ alignments,  
99 scoring, and conflict resolution occurs iteratively until no more conflicts occur and no more contigs  
100 meet the conditions for reassignment as a haplotig.

## 101 **Outputs**

102 Purge Haplotigs produces three FASTA format files for the curated assembly: the curated contigs, the  
103 contigs reassigned as haplotigs, and the contigs reassigned as artefacts. If the original input were a  
104 draft haploid assembly, then the curated contigs would represent the haploid assembly. Alternatively,  
105 if the original input were a draft diploid assembly then the curated contigs represent the haploid  
106 assembly, while the revised diploid assembly would consist of the combination of both the curated  
107 primary contigs and the reassigned haplotigs.

108 In addition to the FASTA output, Purge Haplotigs also produces several metrics to aid in the manual  
109 assessment of the automatic contig assignment function, including the production of dotplots  
110 juxtaposed with read-depth tracks for each reassigned and ambiguous contig. A data table is also  
111 produced which lists each contig reassignment and includes both the alignment and max match  
112 scores. Finally, a text file is produced to show the contig purging order for the situations in which  
113 conflicts were detected. This last file is particularly useful for producing dotplots for visualizing haplotig  
114 nesting and overlaps, as well as assessing any potential over-purging (for instance if the threshold for  
115 reassignment were set too low).

## 116 **Limitations**

117 It should be noted that haplotype switching often occurs in the FALCON Unzip primary contigs  
118 between neighbouring phase blocks. The breaks in phasing usually occur for a reason and  
119 longer-range connectivity information is generally needed to completely reconstruct the two  
120 haplomes. As such Purge Haplotigs cannot resolve haplotype switching. Instead, it will only attempt to  
121 identify contigs that are syntenic and produce a de-duplicated representation of the genome.

## 122 **Results and Discussion**

### 123 **Case Study**

124 The Purge Haplotigs pipeline was first validated using a synthetic dataset (Additional File 1).  
125 However, to fully investigate the practical aspects and impact of syntenic reduction, Purge Haplotigs  
126 was also tested on four draft FALCON Unzip assemblies. Assemblies for *Arabidopsis thaliana*  
127 (Cvi-0 × Col-0), *Clavicornia pyxidata* (a coral fungus), and *Vitis vinifera* L. Cv. Cabernet Sauvignon  
128 (grapevine) were sourced from Chin et al. (2016), and a fourth assembly for *Taeniopygia guttata*  
129 (Zebra finch) genome was sourced from Korlach et al. (2017). For each assembly, alignment files  
130 which consisted of PacBio RS II SMRT subreads mapped to each of the draft diploid assemblies,  
131 were generously provided by Pacific Biosciences.

### 132 **Methods**

133 Assembly metrics were calculated using Quast v4.5 (Gurevich et al., 2013). Genome completeness,  
134 duplication, and fragmentation were predicted using BUSCO v3.0.1 (Simão et al., 2015). The  
135 MUMmer package v4.0.0 (Kurtz et al., 2004) was used to produce genome alignments and dotplots.  
136 Haploid assemblies were assessed for their performance using short read data. Suitable Illumina  
137 paired-end (PE) short reads were publicly available from the Short Read Archive (SRA) for *A. thaliana*  
138 Col-0 × Cvi-0 (SRA accessions: SRR3703081, SRR3703082, SRR3703105), *C. pyxidata* (SRA  
139 accession: SRR1800147), and *T. guttata* (SRA accession: ERR1013157). PE reads were  
140 downloaded and mapped using BWA-MEM v0.7.12 (Li, 2013) to the draft and curated haploid  
141 assemblies. Heterozygous SNPs were called using VarScan v2.3.9 (Koboldt et al., 2012), and  
142 read-coverage and SNP density were analysed using BEDtools v2.25.0 (Quinlan and Hall, 2010). The  
143 SNP density and read-depth histograms were visualized as Circos plots (Krzywinski et al., 2009).  
144 Detailed workflows for processing with Purge Haplotigs and subsequent analysis are available in  
145 Additional File 1.

### 146 **Assembly statistics**

147 The removal of artefactual contigs resulted in the assemblies processed by Purge Haplotigs having  
148 13–27 % fewer contigs (*A. thaliana* Table 1, Additional File 2). More importantly, a common problem  
149 with haploid assemblies contaminated by syntenic contigs, is that the final assembly size is  
150 significantly larger than the actual haploid genome size. The reassigning of redundant contigs by  
151 Purge Haplotigs reduced the total haploid assembly sizes for all four assemblies by 3.0–12.5 %. The  
152 draft FALCON Unzip haploid assembly for *A. thaliana* was 140 Mb, much larger than the current  
153 TAIR10 reference genome of 119 Mb (Lamesch et al., 2012). The Purge Haplotigs haploid assembly  
154 was 127 Mb, placing it close to the expected haploid size. Likewise, the draft Cabernet Sauvignon  
155 haploid assembly was 591 Mb, much larger than the expected size of approximately 500 Mb for  
156 *V. vinifera* (Jaillon et al., 2007). After processing with Purge Haplotigs the improved assembly was  
157 reduced to 517 Mb.

## 158 **Synteny reduction and genome completeness**

159 For the diploid assemblies, there were only minor differences comparing the draft and processed  
160 assemblies with respect to the predicted genome completeness and duplication, as indicated in the  
161 BUSCO analysis (*A. thaliana* Table 1, Additional File 2). For the haploid assemblies, the predicted  
162 level of duplication in the draft *C. pyxidata* and *T. gutatta* assemblies was relatively low at 3.7 % and  
163 4.8 % respectively. The predicted duplication for the draft *A. thaliana* and Cabernet Sauvignon  
164 assemblies were higher at 6.2 % and 12.4 % respectively. The processed haploid assemblies  
165 contained between 40–74 % fewer duplicated BUSCOs than the draft haploid assemblies. Predicted  
166 genome completeness was minimally impacted. The *C. pyxidata* processed assembly contained  
167 0.3 % more missing BUSCOs, but surprisingly the other processed assemblies contained up to 3.2 %  
168 fewer missing BUSCOs. Furthermore, the processed haplotigs contained 2.1–4.6 % fewer missing  
169 BUSCOs, suggesting that the haplotigs are themselves more complete representations of their  
170 genomes after processing with Purge Haplotigs.

## 171 **Phasing coverage**

172 Proper identification of syntenic contig pairs results in improved phasing coverage of diploid  
173 assemblies. To assess if Purge Haplotigs provided improvements to this metric, pairwise alignments  
174 were performed between the primary contigs and haplotigs for both the draft and processed  
175 assemblies, and the total coverage of primary contigs by haplotigs was calculated (*A. thaliana* Figure  
176 3; Additional File 3). For the *C. pyxidata* and *T. gutatta* assemblies the phasing coverage increased by  
177 6.2 % and 7.9 % respectively. The two plant assemblies—which had higher predicted duplication—  
178 showed larger increases in phasing coverage of 12.8 % and 15.8 % for *A. thaliana* and Cabernet  
179 Sauvignon respectively.

## 180 **Short-read performance**

181 As mentioned previously, the erroneous presence of both syntenic contigs in a haploid assembly  
182 results in the presence of mapped regions displaying half the average read-depth and few (if any)  
183 heterozygous variant calls relative to the rest of the genome. To determine if the use short-reads for  
184 genomic analysis was improved after processing, combined read-depth and heterozygous SNP  
185 density plots were generated for both the draft and processed assemblies of *A. thaliana*, *C. pyxidata*,  
186 and *T. guttata* based upon the results from mapping illumina PE short read data (*A. thaliana* Figure 4;  
187 Additional File 4). The mapping rates of the processed assemblies only increased by 0.6–0.84 %  
188 compared to the draft assemblies. However, for *A. thaliana* there were approximately 14.5 % more  
189 heterozygous SNPs called for the processed assembly compared to the draft FALCON Unzip  
190 assembly. Likewise, there were 2.2 % and 12.5 % more heterozygous SNPs called for *T. gutatta* and  
191 *C. pyxidata* respectively.

## 192 **Conclusions**

193 Purge Haplotigs is an effective tool for the early stages of curating highly heterozygous genome  
194 assemblies produced from third-generation long read sequencing. It can produce a mostly  
195 de-duplicated haploid representation of a genome which is important for downstream analysis such as  
196 variant discovery. Purge Haplotigs can also generate an improved diploid representation of a genome  
197 with more syntenic contigs identified and properly paired. This is particularly important for diploid  
198 assemblies, for instance if attempting to reconstruct parent haplotypes.

## 199 **Availability and Requirements**

200 **Project name:** Purge Haplotigs

201 **Project home page:** [https://bitbucket.org/mroachawri/purge\\_haplotigs](https://bitbucket.org/mroachawri/purge_haplotigs)

202 **Operating system:** Linux (tested on Ubuntu 16.04 LTS)

203 **Programming language:** Perl

204 **Dependencies:** BEDTools, SAMTools, BLAST, LASTZ, Perl (with FindBin, Getopt::Long,  
205 Time::Piece, threads, Thread::Semaphore), Rscript (with ggplot2 and scales), GNU Parallel

206 **License:** MIT

207 **Restrictions:** None

## 208 **Abbreviations**

209 **PE:** Paired End

210 **SRA:** Short Read Archive

## 211 **Acknowledgements**

212 We would like to thank Sarah Kingan, Gregory Concepcion, Jason Chin and Pacific Biosciences for  
213 providing the BAM files for the assemblies and for helpful discussions.

## 214 **Funding**

215 The AWRI, a member of the Wine Innovation Cluster in Adelaide, is supported by Australia's  
216 grapegrowers and winemakers through their investment body Wine Australia with matching funds  
217 from the Australian Government. This work was also supported by Bioplatforms Australia (BPA)  
218 through the Australian Government National Collaborative Research Infrastructure Strategy (NCRIS)  
219 scheme.

220 **Figures and Tables**

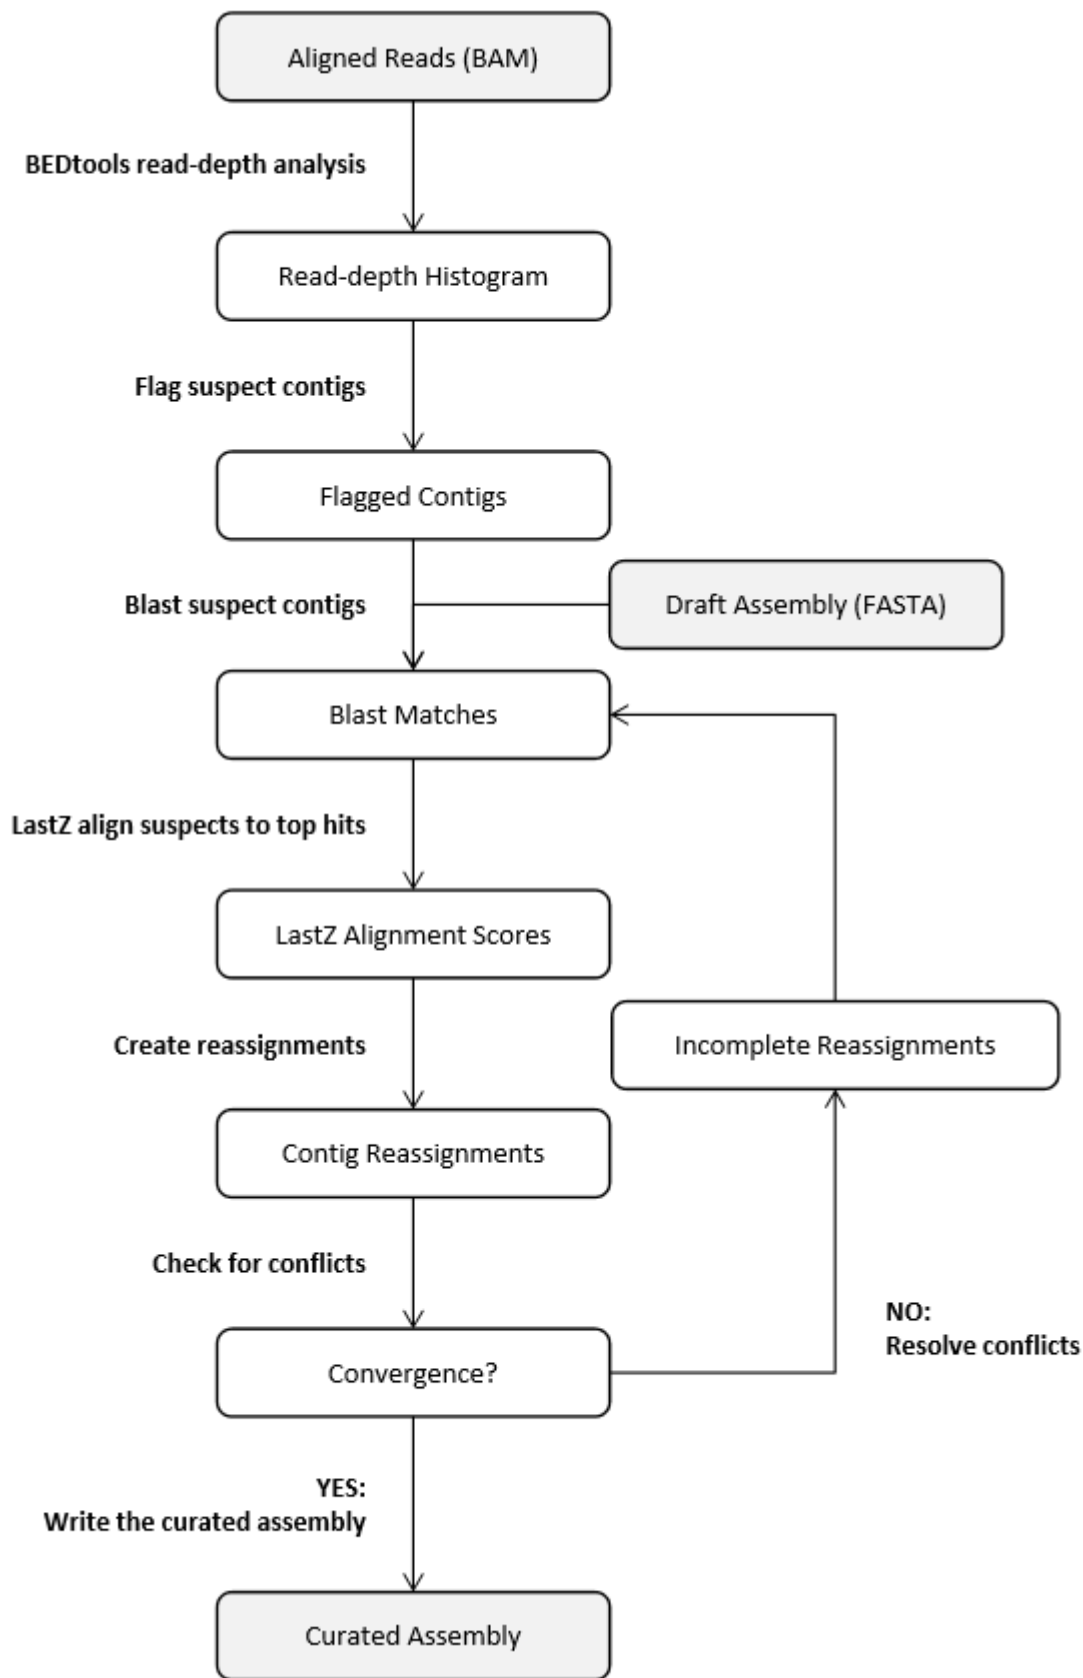

221

222 **Figure 1: Flow chart for the Purge Haplotigs pipeline.**



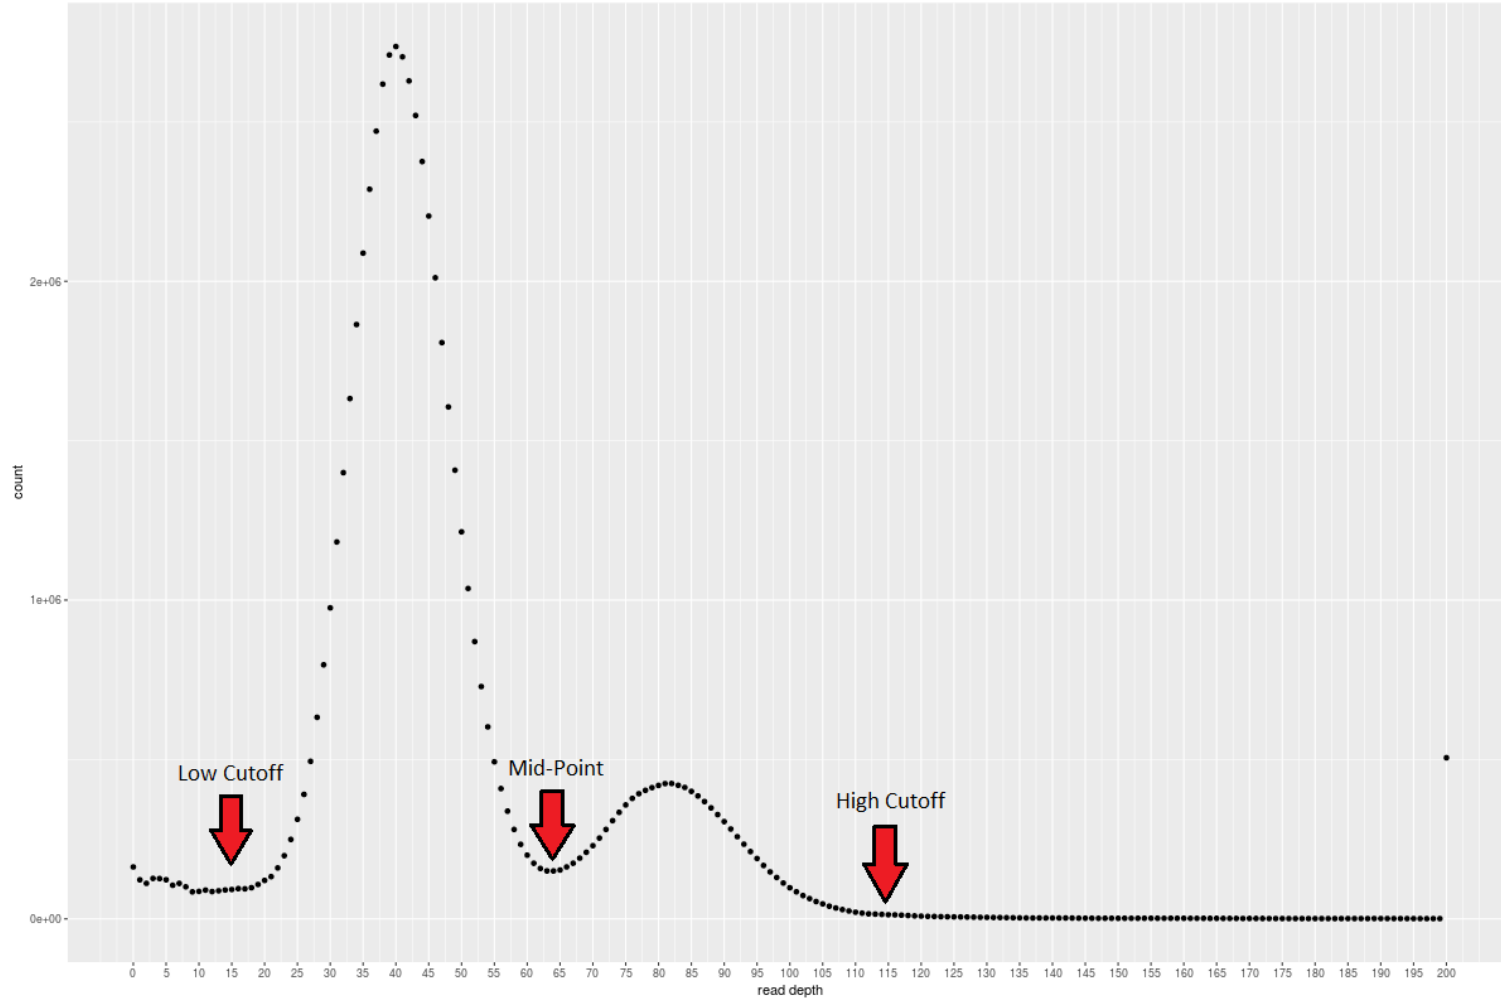

223

224 **Figure 2: Example read-depth histogram produced by Purge Haplotigs.** This example for *C. pyxidata* was produced using PacBio RS II reads  
225 mapped to the diploid assembly. Example cut-offs are indicated for use with the second stage of the pipeline.

226 **Table 1: Assembly statistics for draft FALCON Unzip and Purge Haplotigs-processed**  
 227 **A. *thaliana* assemblies.**

|                       | Primary Contigs |             | Haplotigs   |             |
|-----------------------|-----------------|-------------|-------------|-------------|
|                       | Original        | Curated     | Original    | Curated     |
| <b>Contigs</b>        | 172             | 107         | 248         | 201         |
| <b>Largest contig</b> | 13 319 401      | 13 319 401  | 11 648 134  | 11 648 134  |
| <b>Total length</b>   | 140 024 976     | 126 787 811 | 104 934 860 | 116 306 003 |
| <b>GC (%)</b>         | 36.67           | 36.68       | 36.12       | 36.15       |
| <b>N50</b>            | 7 960 654       | 7 979 657   | 6 920 133   | 4 634 947   |

228 **Table 2: BUSCO statistics for draft FALCON Unzip and Purge Haplotigs-processed**  
 229 **A. *thaliana* assemblies.**

| <b>Haploid Assembly<br/>(Primary contigs)</b> | <b>FALCON Unzip</b> |          | <b>Purge Haplotigs</b> |          |
|-----------------------------------------------|---------------------|----------|------------------------|----------|
|                                               | <b>#</b>            | <b>%</b> | <b>#</b>               | <b>%</b> |
| Total BUSCO groups searched                   | 1440                | 100.0    | 1440                   | 100.0    |
| Complete BUSCOs                               | 1413                | 98.1     | 1408                   | 97.8     |
| Complete and single-copy BUSCOs               | 1324                | 91.9     | 1376                   | 95.6     |
| Complete and duplicated BUSCOs                | 89                  | 6.2      | 32                     | 2.2      |
| Fragmented BUSCOs                             | 5                   | 0.3      | 9                      | 0.6      |
| Missing BUSCOs                                | 22                  | 1.5      | 23                     | 1.6      |

  

| <b>Diploid Assembly<br/>(Primary + Haplotigs)</b> | <b>FALCON Unzip</b> |          | <b>Purge Haplotigs</b> |          |
|---------------------------------------------------|---------------------|----------|------------------------|----------|
|                                                   | <b>#</b>            | <b>%</b> | <b>#</b>               | <b>%</b> |
| Total BUSCO groups searched                       | 1440                | 100.0    | 1440                   | 100.0    |
| Complete BUSCOs                                   | 1414                | 98.2     | 1414                   | 98.2     |
| Complete and single-copy BUSCOs                   | 70                  | 4.9      | 70                     | 4.9      |
| Complete and duplicated BUSCOs                    | 1344                | 93.3     | 1344                   | 93.3     |
| Fragmented BUSCOs                                 | 4                   | 0.3      | 4                      | 0.3      |
| Missing BUSCOs                                    | 22                  | 1.5      | 22                     | 1.5      |

  

| <b>Phase Blocks<br/>(Haplotigs only)</b> | <b>FALCON Unzip</b> |          | <b>Purge Haplotigs</b> |          |
|------------------------------------------|---------------------|----------|------------------------|----------|
|                                          | <b>#</b>            | <b>%</b> | <b>#</b>               | <b>%</b> |
| Total BUSCO groups searched              | 1440                | 100.0    | 1440                   | 100.0    |
| Complete BUSCOs                          | 1342                | 93.2     | 1397                   | 97.0     |
| Complete and single-copy BUSCOs          | 1313                | 91.2     | 1371                   | 95.2     |
| Complete and duplicated BUSCOs           | 29                  | 2.0      | 26                     | 1.8      |
| Fragmented BUSCOs                        | 5                   | 0.3      | 4                      | 0.3      |
| Missing BUSCOs                           | 93                  | 6.5      | 39                     | 2.7      |

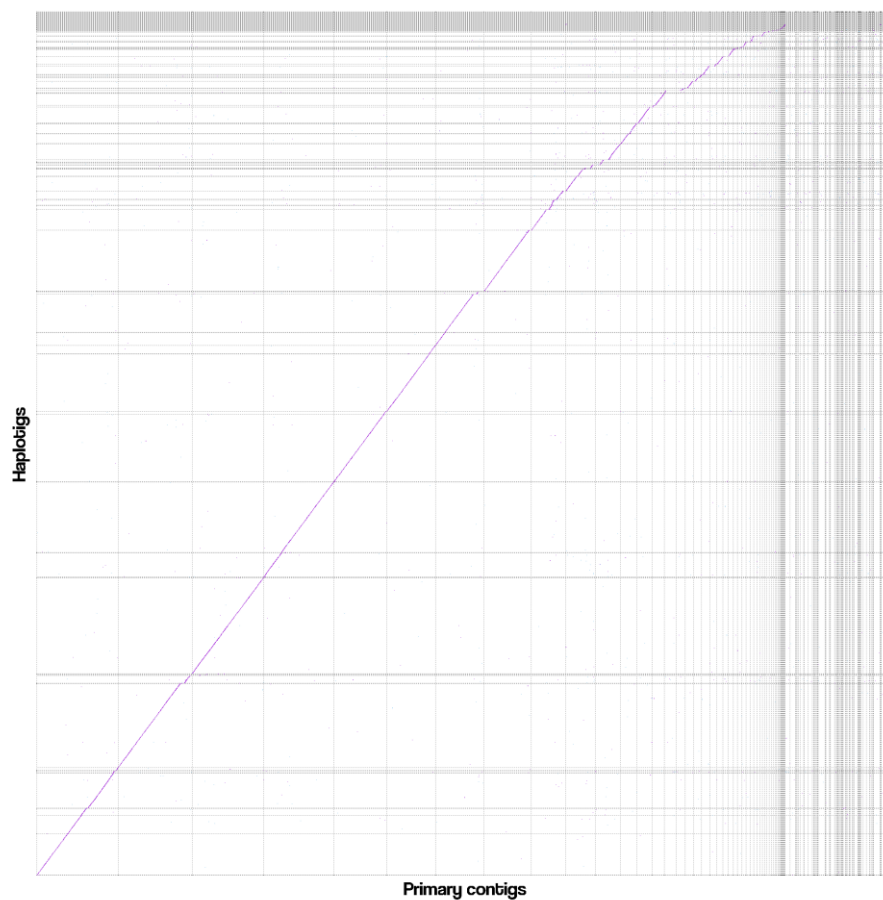

FALCON Unzip

Primary contig coverage: 69.9 %

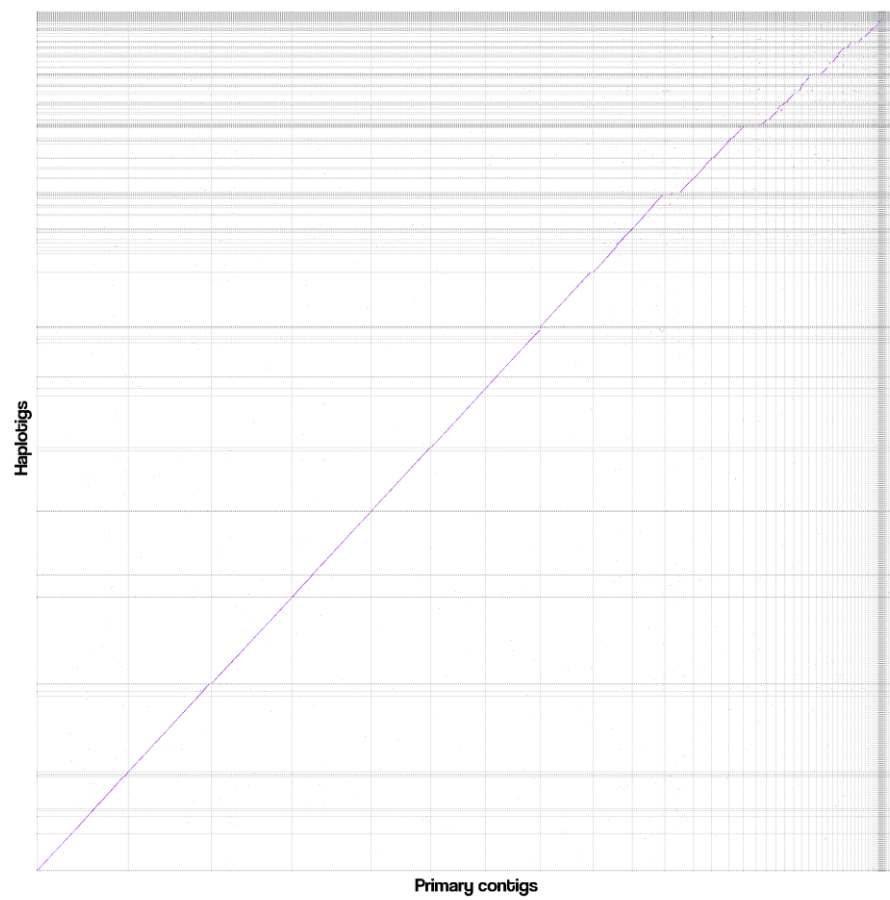

Purge Haplontigs

Primary contig coverage: 82.7 %

231 **Figure 3: Dotplots for *Arabidopsis thaliana* assemblies.** Haplontigs were aligned to primary contigs, filtered for one-to-one best alignments,  
 232 coverage of the primary contigs by haplontigs calculated, and dotplots were laid out by longest alignments. Vertical gaps correspond to sequence in  
 233 haplontigs that is not present in the primary contigs, and horizontal gaps correspond to sequence in the primary contigs not present in the haplontigs.

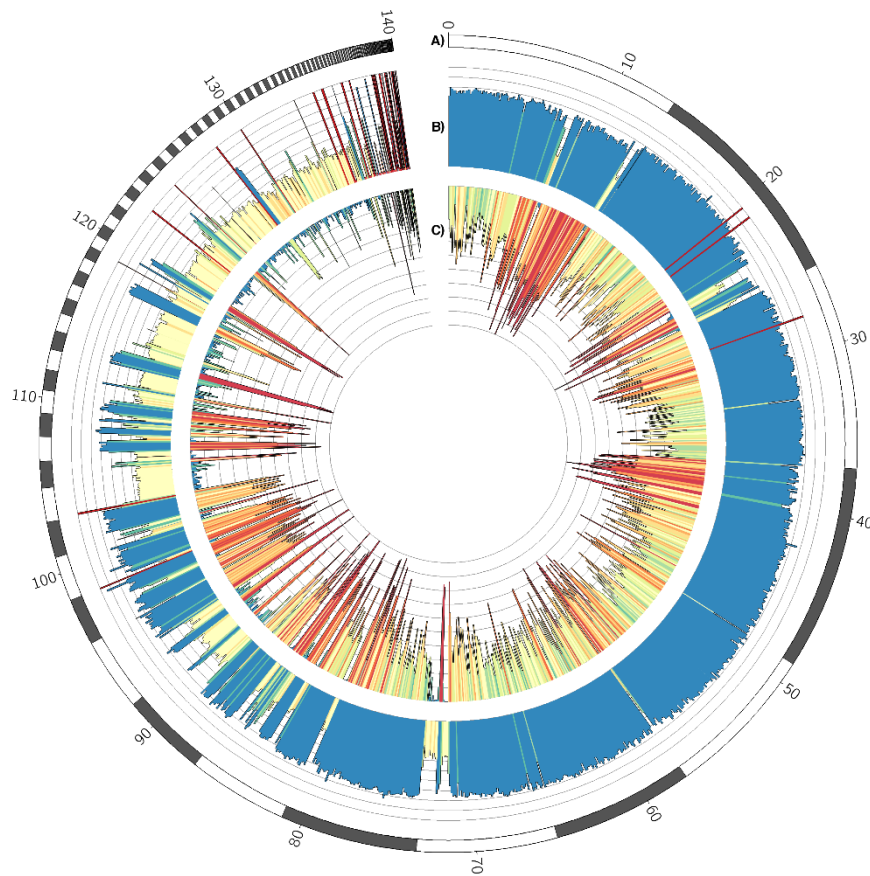

### FALCON Unzip

Reads concordantly mapped: 69.58 %  
 Filtered Het SNPs called: 612 073

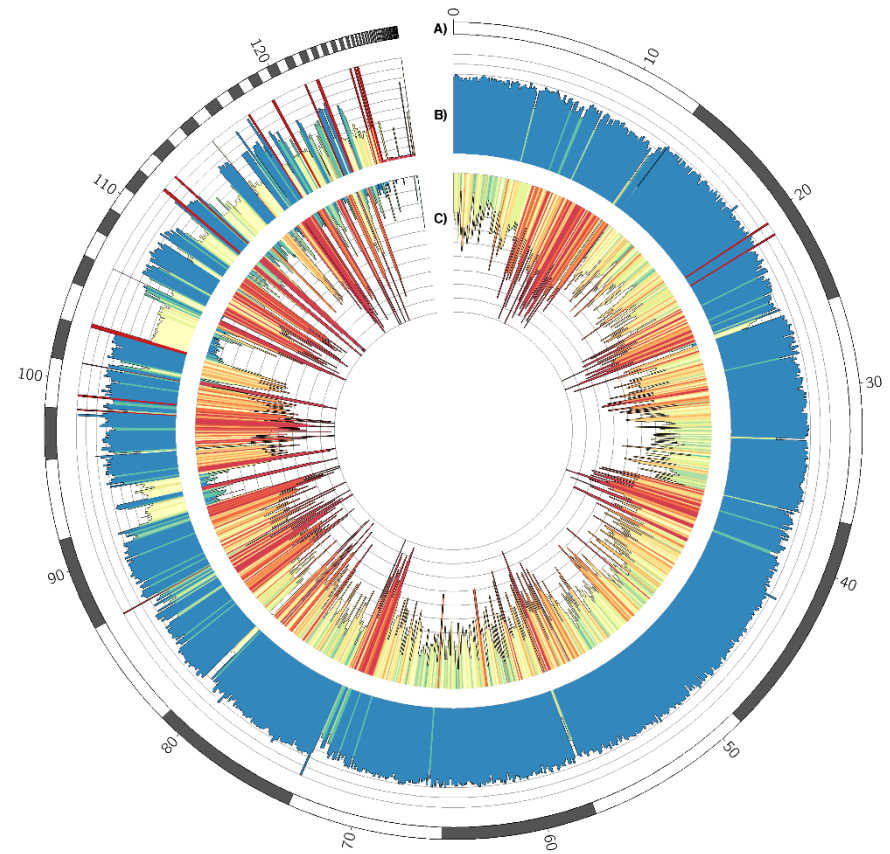

### Purge Haplotigs

Reads concordantly mapped: 70.39 %  
 Filtered Het SNPs called: 701 053

234 **Figure 4: Circos plots for *Arabidopsis thaliana* haploid assemblies.** Illumina PE reads were mapped and heterozygous SNPs were called for the  
 235 draft FALCON Unzip assembly (LEFT) and the assembly curated with Purge Haplotigs (RIGHT). The tracks shown in the circos plots are: **A)** Contigs  
 236 (ordered by length), **B)** Read-depth histogram (reads per genome window), and **C)** SNP density (SNPs per genome window).

## 237 **Supplementary Information**

238 Additional File 1: Workflows for Purge Haplotigs and subsequent analysis.

239       ➤ Workflows.pdf

240 Additional File 2: Quast and BUSCO analysis results for all assemblies.

241       ➤ Quast\_BUSCO.xlsx

242 Additional File 3: Circos Plots and mapping statistics for *C. pyxidata*, and *T. guttata*.

243       ➤ Circos.pdf

244 Additional File 4: Dotplots and coverage for *C. pyxidata*, *V. vinifera* L. Cv. Cabernet Sauvignon, and  
245 *T. guttata*.

246       ➤ Dotplots.pdf

## 247 **Availability of Data**

248 The simulated genome dataset is available at: <https://doi.org/10.5281/zenodo.1042847>. The dataset  
249 for the analysis described in this study of the draft and curated genome assemblies is available at:  
250 <https://doi.org/10.5281/zenodo.1043619>.

## 251 **References**

- 252 BADOUIN, H., GOUZY, J., GRASSA, C. J., MURAT, F., STATON, S. E., COTTRET, L., LELANDAI-BRIÈRE, C., OWENS,  
253 G. L., CARRÈRE, S., MAYJONADE, B., LEGRAND, L., GILL, N., KANE, N. C., BOWERS, J. E., HUBNER, S.,  
254 BELLEC, A., BÉRARD, A., BERGÈS, H., BLANCHET, N., BONIFACE, M.-C., BRUNEL, D., CATRICE, O.,  
255 CHAIDIR, N., CLAUDEL, C., DONNADIEU, C., FARAUT, T., FIEVET, G., HELMSTETTER, N., KING, M.,  
256 KNAPP, S. J., LAI, Z., LE PASLIER, M.-C., LIPPI, Y., LORENZON, L., MANDEL, J. R., MARAGE, G.,  
257 MARCHAND, G., MARQUAND, E., BRET-MESTRIES, E., MORIEN, E., NAMBEESAN, S., NGUYEN, T.,  
258 PEGOT-ESPAGNET, P., POUJILLY, N., RAFTIS, F., SALLET, E., SCHIEX, T., THOMAS, J., VANDECASTEELE, C.,  
259 VARÈS, D., VEAR, F., VAUTRIN, S., CRESPI, M., MANGIN, B., BURKE, J. M., SALSE, J., MUÑOS, S.,  
260 VINCOURT, P., RIESEBERG, L. H. & LANGLADE, N. B. 2017. The sunflower genome provides insights into  
261 oil metabolism, flowering and Asterid evolution. *Nature*, 546, 148-152.
- 262 CAMACHO, C., COULOURIS, G., AVAGYAN, V., MA, N., PAPADOPOULOS, J., BEALER, K. & MADDEN, T. L. 2009.  
263 BLAST+: architecture and applications. *BMC Bioinformatics*, 10, 421.
- 264 CHIN, C. S., PELUSO, P., SEDLAZECK, F. J., NATTESTAD, M., CONCEPCION, G. T., CLUM, A., DUNN, C., O'MALLEY,  
265 R., FIGUEROA-BALDERAS, R., MORALES-CRUZ, A., CRAMER, G. R., DELLEDONNE, M., LUO, C., ECKER, J.  
266 R., CANTU, D., RANK, D. R. & SCHATZ, M. C. 2016. Phased diploid genome assembly with single-  
267 molecule real-time sequencing. *Nat Methods*, 13, 1050-1054.
- 268 CONCEPCION, G. 2016. *get\_homologs.py* [Online]. Available: [https://github.com/PacificBiosciences/apps-](https://github.com/PacificBiosciences/apps-scripts)  
269 [scripts](https://github.com/PacificBiosciences/apps-scripts) [Accessed 2017].
- 270 GUREVICH, A., SAVELIEV, V., VYAHHI, N. & TESLER, G. 2013. QUAST: quality assessment tool for genome  
271 assemblies. *Bioinformatics*, 29, 1072-1075.
- 272 HARRIS, R. S. 2007. *Improved pairwise alignment of genomic DNA*, The Pennsylvania State University.
- 273 HUANG, S., KANG, M. & XU, A. 2017. HaploMerger2: rebuilding both haploid sub-assemblies from high-  
274 heterozygosity diploid genome assembly. *Bioinformatics*, 33, 2577-2579.
- 275 JAILLON, O., AURY, J. M., NOEL, B., POLICRITI, A., CLEPET, C., CASAGRANDE, A., CHOISNE, N., AUBOURG, S.,  
276 VITULO, N., JUBIN, C., VEZZI, A., LEGEAI, F., HUGUENEY, P., DASILVA, C., HORNER, D., MICA, E., JUBLOT,

- 277 D., POULAIN, J., BRUYERE, C., BILLAULT, A., SEGURENS, B., GOUYVENOUX, M., UGARTE, E.,  
278 CATTONARO, F., ANTHOUARD, V., VICO, V., DEL FABBRO, C., ALAUX, M., DI GASPERO, G., DUMAS, V.,  
279 FELICE, N., PAILLARD, S., JUMAN, I., MOROLDO, M., SCALABRIN, S., CANAGUIER, A., LE CLAINCHE, I.,  
280 MALACRIDA, G., DURAND, E., PESOLE, G., LAUCOU, V., CHATELET, P., MERDINOGLU, D., DELLEDONNE,  
281 M., PEZZOTTI, M., LECHARNY, A., SCARPELLI, C., ARTIGUENAVE, F., PE, M. E., VALLE, G., MORGANTE,  
282 M., CABOCHE, M., ADAM-BLONDON, A. F., WEISSENBACH, J., QUETIER, F. & WINCKER, P. 2007. The  
283 grapevine genome sequence suggests ancestral hexaploidization in major angiosperm phyla. *Nature*,  
284 449, 463-7.
- 285 JARVIS, D. E., HO, Y. S., LIGHTFOOT, D. J., SCHMÖCKEL, S. M., LI, B., BORM, T. J. A., OHYANAGI, H., MINETA, K.,  
286 MICHELL, C. T., SABER, N., KHARBATIA, N. M., RUPPER, R. R., SHARP, A. R., DALLY, N., BOUGHTON, B.  
287 A., WOO, Y. H., GAO, G., SCHIJLEN, E. G. W. M., GUO, X., MOMIN, A. A., NEGRÃO, S., AL-BABILI, S.,  
288 GEHRING, C., ROESSNER, U., JUNG, C., MURPHY, K., AROLD, S. T., GOJOBORI, T., LINDEN, C. G. V. D.,  
289 VAN LOO, E. N., JELLEN, E. N., MAUGHAN, P. J. & TESTER, M. 2017. The genome of *Chenopodium*  
290 quinoa. *Nature*, 542, 307-312.
- 291 KAJITANI, R., TOSHIMOTO, K., NOGUCHI, H., TOYODA, A., OGURA, Y., OKUNO, M., YABANA, M., HARADA, M.,  
292 NAGAYASU, E., MARUYAMA, H., KOHARA, Y., FUJIYAMA, A., HAYASHI, T. & ITOH, T. 2014. Efficient de  
293 novo assembly of highly heterozygous genomes from whole-genome shotgun short reads. *Genome*  
294 *Research*, 24, 1384-1395.
- 295 KINGAN, S. 2016. *HomolContigsByAnnotation* [Online]. Available:  
296 <https://github.com/skingan/HomolContigsByAnnotation> [Accessed 2017].
- 297 KOBOLDT, D. C., ZHANG, Q., LARSON, D. E., SHEN, D., MCLELLAN, M. D., LIN, L., MILLER, C. A., MARDIS, E. R.,  
298 DING, L. & WILSON, R. K. 2012. VarScan 2: somatic mutation and copy number alteration discovery in  
299 cancer by exome sequencing. *Genome Res*, 22, 568-76.
- 300 KOREN, S., WALENZ, B. P., BERLIN, K., MILLER, J. R., BERGMAN, N. H. & PHILLIPPY, A. M. 2017. Canu: scalable  
301 and accurate long-read assembly via adaptive k-mer weighting and repeat separation. *Genome*  
302 *Research*, 27, 722-736.
- 303 KORLACH, J., GEDMAN, G., KING, S., CHIN, J., HOWARD, J., CANTIN, L. & JARVIS, E. D. 2017. De Novo PacBio  
304 long-read and phased avian genome assemblies correct and add to genes important in neuroscience  
305 research. *bioRxiv*.
- 306 KRZYWINSKI, M. I., SCHEIN, J. E., BIROL, I., CONNORS, J., GASCOYNE, R., HORSMAN, D., JONES, S. J. & MARRA,  
307 M. A. 2009. Circos: An information aesthetic for comparative genomics. *Genome Research*.
- 308 KURTZ, S., PHILLIPPY, A., DELCHER, A. L., SMOOT, M., SHUMWAY, M., ANTONESCU, C. & SALZBERG, S. L. 2004.  
309 Versatile and open software for comparing large genomes. *Genome Biology*, 5, R12-R12.
- 310 LAMESCH, P., BERARDINI, T. Z., LI, D., SWARBRECK, D., WILKS, C., SASIDHARAN, R., MULLER, R., DREHER, K.,  
311 ALEXANDER, D. L., GARCIA-HERNANDEZ, M., KARTHIKEYAN, A. S., LEE, C. H., NELSON, W. D., PLOETZ, L.,  
312 SINGH, S., WENSEL, A. & HUALA, E. 2012. The Arabidopsis Information Resource (TAIR): improved gene  
313 annotation and new tools. *Nucleic Acids Research*, 40, D1202-D1210.
- 314 LI, H. 2013. Aligning sequence reads, clone sequences and assembly contigs with BWA-MEM. *ARXIV*.
- 315 LOMAN, N. J., QUICK, J. & SIMPSON, J. T. 2015. A complete bacterial genome assembled de novo using only  
316 nanopore sequencing data. *Nat Meth*, 12, 733-735.
- 317 OLSON, N. D., LUND, S. P., COLMAN, R. E., FOSTER, J. T., SAHL, J. W., SCHUPP, J. M., KEIM, P., MORROW, J. B.,  
318 SALIT, M. L. & ZOOK, J. M. 2015. Best practices for evaluating single nucleotide variant calling methods  
319 for microbial genomics. *Frontiers in Genetics*, 6, 235.
- 320 PRYSZCZ, L. P. & GABALDON, T. 2016. Redundans: an assembly pipeline for highly heterozygous genomes.  
321 *Nucleic Acids Res*, 44, e113.
- 322 PRYSZCZ, L. P., NÉMETH, T., GÁCSEK, A. & GABALDÓN, T. 2014. Genome Comparison of *Candida orthopsilosis*  
323 Clinical Strains Reveals the Existence of Hybrids between Two Distinct Subspecies. *Genome Biology*  
324 *and Evolution*, 6, 1069-1078.
- 325 QUINLAN, A. R. & HALL, I. M. 2010. BEDTools: a flexible suite of utilities for comparing genomic features.  
326 *Bioinformatics*, 26, 841-842.
- 327 SAFONOVA, Y., BANKEVICH, A. & PEVZNER, P. A. 2015. dipSPAdes: Assembler for Highly Polymorphic Diploid  
328 Genomes. *J Comput Biol*, 22, 528-45.
- 329 SCHWESSINGER, B., SPERSCHNEIDER, J., CUDDY, W. S., GARNICA, D. P., MILLER, M. E., TAYLOR, J. M., DODDS,  
330 P. N., FIGUEROA, M., PARK, R. F. & RATHJEN, J. P. 2018. A Near-Complete Haplotype-Phased Genome

- 331 of the Dikaryotic Wheat Stripe Rust Fungus *Puccinia striiformis* f. sp. *tritici* Reveals High Interhaplotype  
332 Diversity. *mBio*, 9.
- 333 SIMÃO, F. A., WATERHOUSE, R. M., IOANNIDIS, P., KRIVENTSEVA, E. V. & ZDOBNOV, E. M. 2015. BUSCO:  
334 assessing genome assembly and annotation completeness with single-copy orthologs. *Bioinformatics*,  
335 31, 3210-3212.
- 336 SMALL, K. S., BRUDNO, M., HILL, M. M. & SIDOW, A. 2007. A haplome alignment and reference sequence of  
337 the highly polymorphic *Ciona savignyi* genome. *Genome Biology*, 8, R41-R41.
- 338 VANBUREN, R., WAI, C. M., OU, S., PARDO, J., BRYANT, D., JIANG, N., MOCKLER, T. C., EDGER, P. & MICHAEL, T.  
339 P. 2018. Extreme haplotype variation in the desiccation-tolerant clubmoss *Selaginella lepidophylla*. *Nat*  
340 *Commun*, 9, 13.
- 341 VINSON, J. P., JAFFE, D. B., O'NEILL, K., KARLSSON, E. K., STANGE-THOMANN, N., ANDERSON, S., MESIROV, J. P.,  
342 SATOH, N., SATOU, Y., NUSBAUM, C., BIRREN, B., GALAGAN, J. E. & LANDER, E. S. 2005. Assembly of  
343 polymorphic genomes: algorithms and application to *Ciona savignyi*. *Genome Res*, 15, 1127-35.
- 344 WEISENFELD, N. I., KUMAR, V., SHAH, P., CHURCH, D. M. & JAFFE, D. B. 2017. Direct determination of diploid  
345 genome sequences. *Genome Research*, 27, 757-767.
- 346
